# Supplementary material
Source: publisher figshare collection journal article supplement (https://acs.figshare.com/ndownloader/files/4719991)
Supplement: Supplementary file 1 [file 4719991]

**Supporting Information for**  
**“Dynamic Biphasic Counterion Exchange in a Configurationally Stable Aziridinium Ion: Efficient Synthesis and Isolation of a Koga C<sub>2</sub>-Symmetric Tetraamine Base”**

Matthew J. Frizzle<sup>a</sup>, Sebastian Caille<sup>b</sup>, Teresa L. Marshall<sup>a</sup>, Kenneth McRae<sup>b</sup>, Kelly Nadeau<sup>a</sup>, Gary Guo<sup>c</sup>, Steven Wu<sup>c</sup>, Michael J. Martinelli<sup>b</sup>, and George A. Moniz<sup>a\*</sup>

<sup>a</sup>Chemical Process R&D, Amgen, Inc., One Kendall Square, Building 1000, Cambridge, MA 02139

<sup>b</sup>Chemical Process R&D, Amgen, Inc., One Amgen Center Drive, Thousand Oaks, CA 91320

<sup>c</sup>Analytical Chemistry, Amgen, Inc., One Amgen Center Drive, Thousand Oaks, CA 91320

---

**In-Process Control Method for Koga Amine Synthesis Steps 1 and 2 and Final Purity (HPLC)**

**I. Analytical Method Information**

HPLC: Agilent 1100 Series

Column: Waters X-Bridge, 3.5  $\mu$ m, 150 x 4.6 mm, (Waters, part #186003034)

Mobile Phase A: (90% 25 mM Ammonium Acetate in water, 10% Acetonitrile; pH 6.5)

Mobile Phase B: (90% Acetonitrile, 10% 25 mM Ammonium Acetate in water)

Flow: 1.0 mL/min

Detector: UV at 215 nm

Injection Volume: 5  $\mu$ L

Gradient:

| Time (min) | % Mobile Phase A | % Mobile Phase B |
|------------|------------------|------------------|
| 0.00       | 100              | 0                |
| 2.00       | 100              | 0                |
| 10.50      | 76               | 24               |
| 20.00      | 0                | 100              |
| 21.00      | 0                | 100              |
| 21.50      | 100              | 0                |

**II. Sample Preparation for Step 1 (Synthesis of aminoalcohols **8a** and **8b**)**

Weigh 14.0 to 16.0 mg.

Transfer to a 5 mL volumetric flask.

Add approximately 2 mL of the Mobile Phase B. Mix, and sonicate as needed for approximately 3 minutes or until completely dissolved. Cool to room temperature. Dilute to volume with the Mobile Phase B. Mix well.

**III. Sample Preparation for Step 2 (Formation of Aziridinium ion **10b**)**

Same as for Step 1

#### IV. Representative Chromatogram

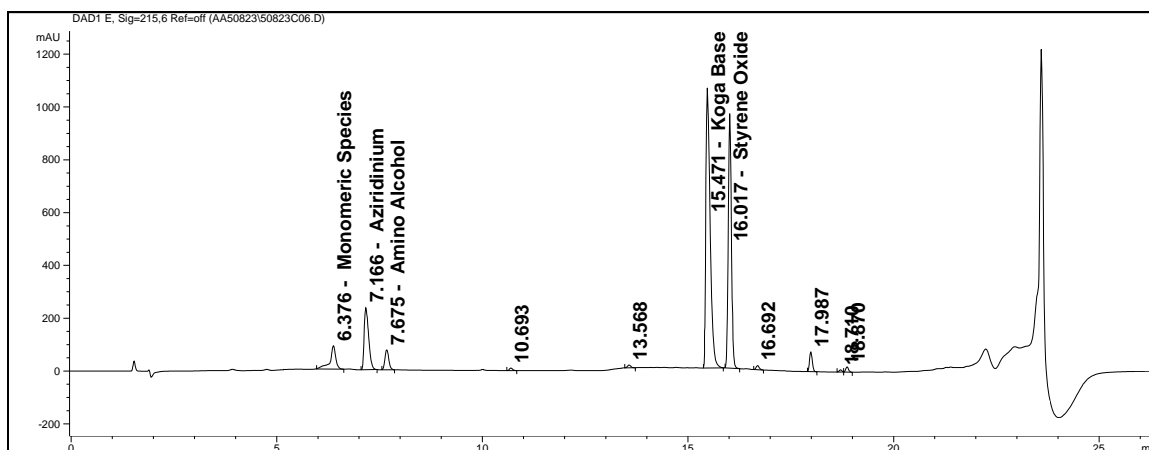

---

#### Concentration In-Process Control Method for Koga Amine Formation (HPLC)

##### I. Analytical Method Information

Same as above with reaction MTBE layer ONLY. Compare to standard of (*R,R*)-5.

##### II. Sample Preparation

Same as above only using a measured volume of MTBE layer.

##### III. Representative Chromatogram

Same as above

---

#### Chiral Method for Koga Amine (HPLC)

##### I. Analytical Method Information

HPLC: Agilent 1100

Column: Chiralpak<sup>®</sup> AD-H 4.6x250mm (Chiral Technologies, Inc., cat.# 19325)

Mobile phase: 35/10/55/0.03 Hexane:EtOH:MeOH:TEA, v/v

Flow: 0.25 ml/min

Column Temperature: 20°C

Detector: UV at 215nm

Run Time: 30 min

Injection volume: 10µl

##### II. Sample Preparation

Weigh about 27-33 mg of Koga base  
Transfer into a 50 mL volumetric flask  
Dissolve with the Mobile phase  
Dilute to volume with Mobile phase and mix well

### III. Representative Chromatogram

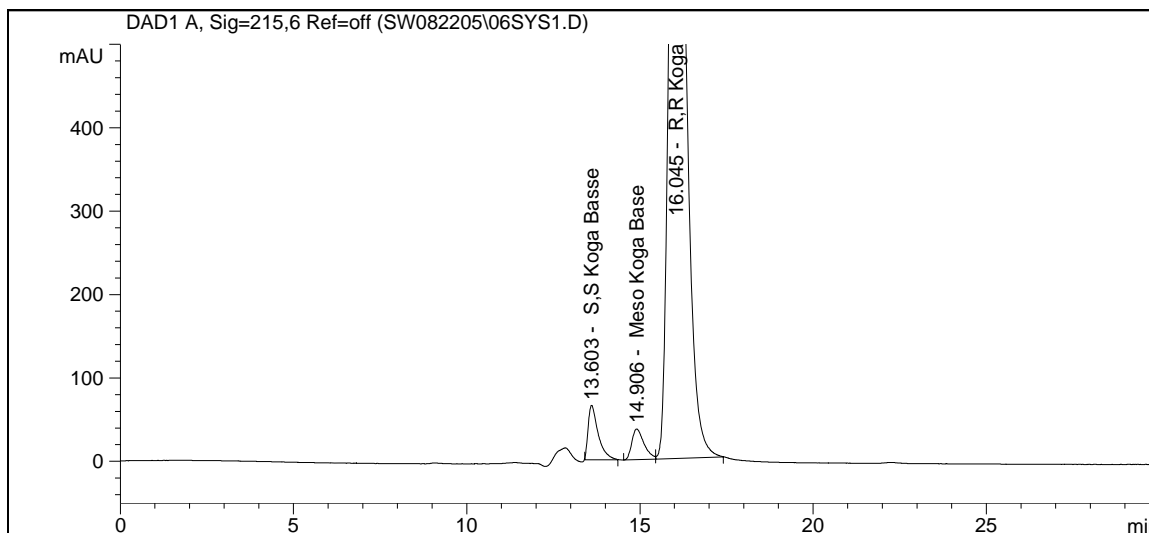

---

### Method for Determination of Residual Solvents (GC)

#### I. Analytical Method Information

GC: Agilent 6890  
Column: RTX-624, 30m x 0.25mm, 1.4 $\mu$ m (Restek, part # 10968)  
Temperatures: 35°C, hold for 0.5 min, 15°C/min  $\rightarrow$  170°C  
Run Time: 9.5 min  
Pressure/Flow: constant pressure at 20psi  
Split Ratio: 20:1  
Injection Volume: 1 $\mu$ l

---

### Method for Determining Partitions of (*R,R*)-5, Monomer (*R*)-13, and Diamine 11 (GC)

#### I. Analytical Method Information

GC: Agilent 6890  
Column: HP-5, 30m x 0.32mm, 0.25 $\mu$ m (Agilent, part # 19091J-413)  
Temperatures: 35°C, 15°C/min  $\rightarrow$  325°C, hold for 5 min

Run Time: 24.33 min  
Pressure/Flow: Constant flow at 2.0 ml/min  
Split Ratio: 20:1  
Injection Volume: 1µl injection volume

## II. Sample Preparation

Inject partition layer

---

## Method for Determining Impurities in Mother Liquor (GC/MS)

### I. Analytical Method Information

GC/MS: Agilent 6890 (GC) and 5973 (MSD)  
Column: HP-5MS, 30m x 0.25mm, 0.25um (Agilent, part # 19091S-433)  
Temperatures: 35°C, 5°C/min → 75°C, hold for 5 min, 25°C → 325°C  
Run Time: 23 min  
Pressure/Flow: Constant flow at 1.3 ml/min  
Split Ratio: 10:1  
Injection Volume: 1µl  
Source: Chemical Ionization (methane used as ionizing gas)

### II. Sample Preparation

Inject reaction mixture/mother liquor

---

## Differential Scanning Calorimetry Trace for (*R,R*)-5

## DSC

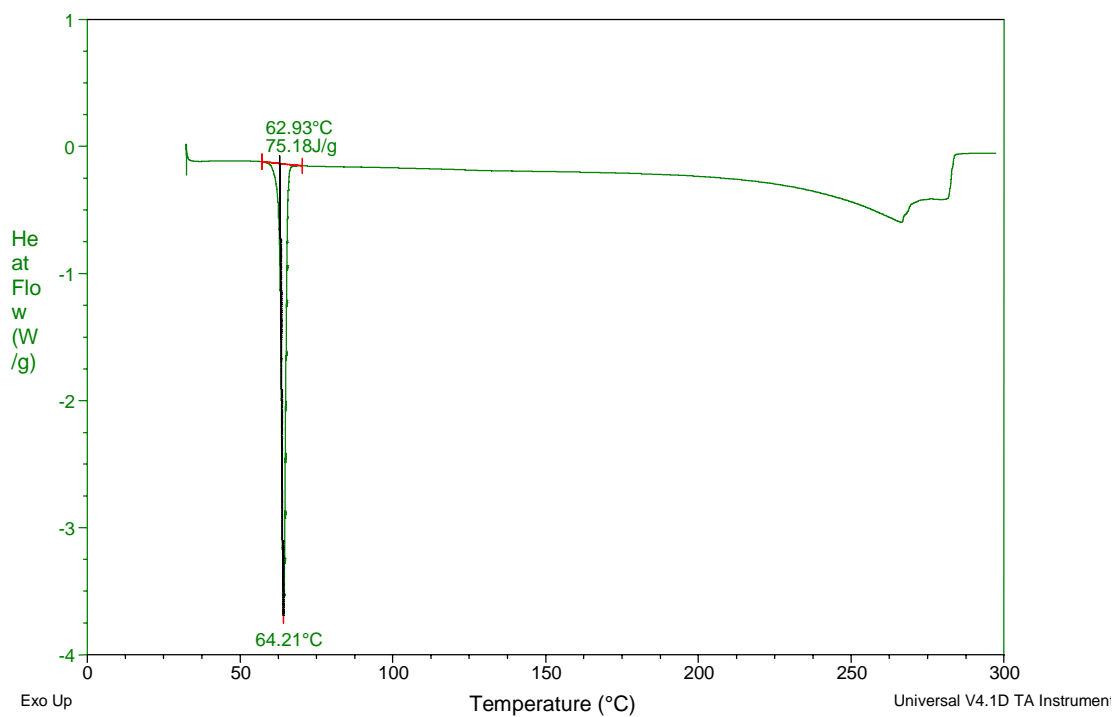

## <sup>1</sup>H NMR Data and Spectrum for β-Chloroamine **12** and Precipitate<sup>1</sup>

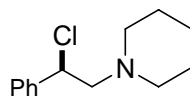

**12**

### A. <sup>1</sup>H NMR Data for **12**:

<sup>1</sup>H NMR (400 MHz, CDCl<sub>3</sub>) δ 7.26 – 7.40 (comp. m, 5H); 5.00 (dd, *J* = 6.0, 8.0 Hz, 1H); 3.18 (t, *J* = 5.6 Hz, 1H); 3.01 (dd, *J* = 8.0 Hz, 13.6 Hz, 1H); 2.80 (dd, *J* = 5.6, 13.6 Hz, 1H); 2.50 (m, 4H); 1.37-1.58 (comp. m, 6H).

### B. <sup>1</sup>H NMR Spectrum for **12**:

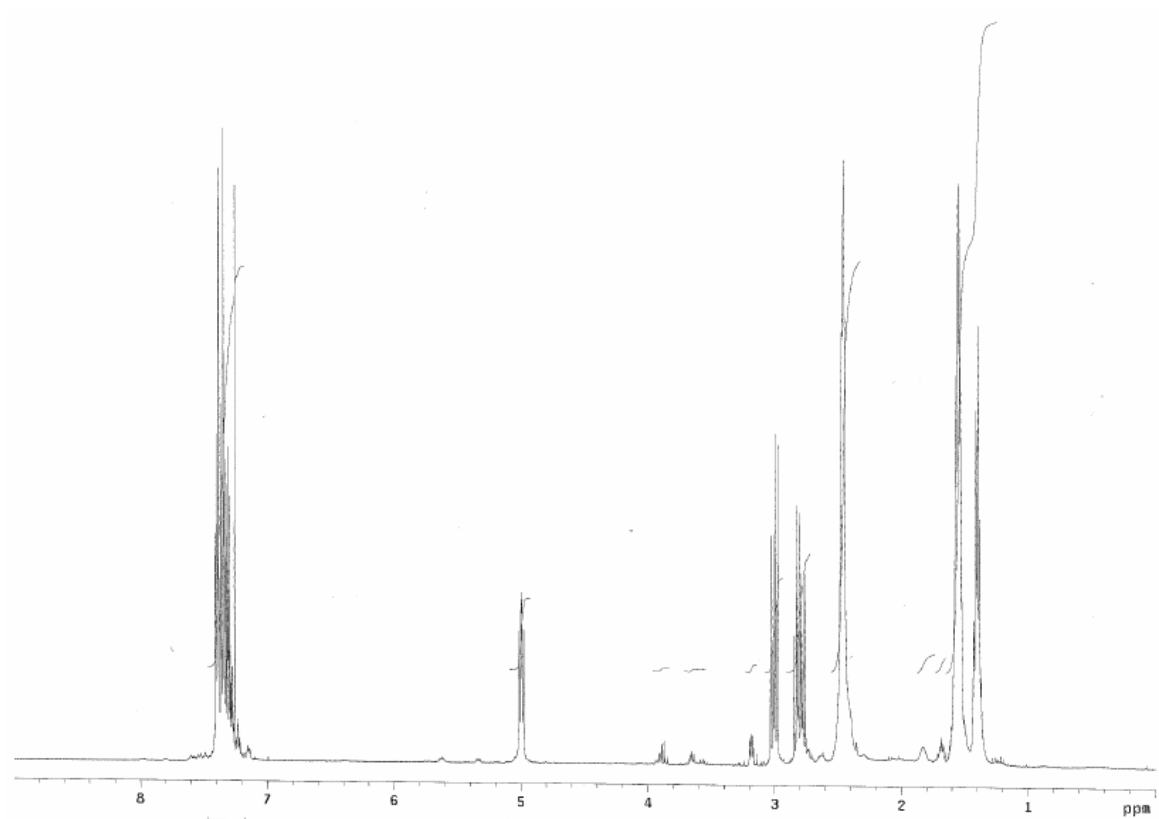

C.  $^1\text{H}$  NMR Spectrum for Precipitate from MsCl Reaction:

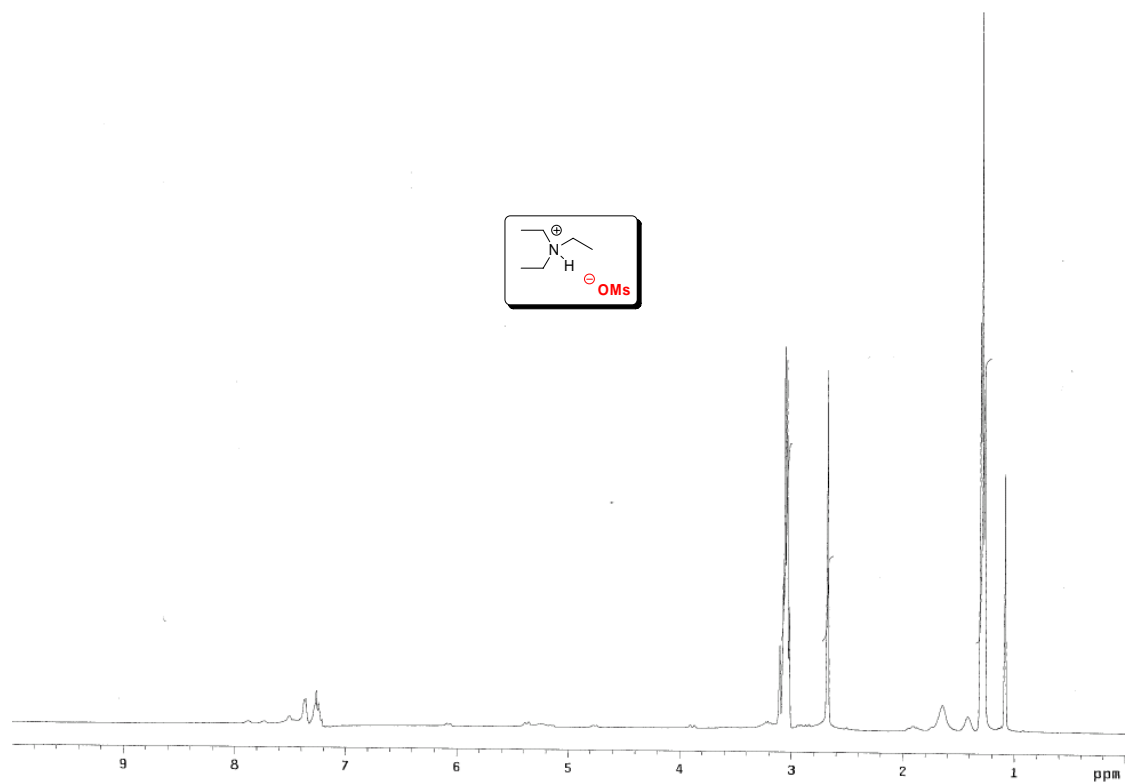

### Synthesis of Aziridinium Mesylate (**10a**):

To a 100 mL round-bottom flask was added a mixture of aminoalcohols **8a** and **8b** (5.26g, 25.6 mmol, 1.0 equiv). The flask was sealed and purged with N<sub>2</sub>(g) and MTBE (30 mL) was added followed by Et<sub>3</sub>N (4.3 mL, 30.6 mmol, 1.2 equiv). The mixture was cooled to 10 °C and Methanesulfonic anhydride (5.34g, 30.6 mmol, 1.2 equiv) was added portionwise with stirring at such a rate as to maintain the internal temperature below 20 °C. Once addition was complete the mixture was allowed to warm to 22 °C with concomitant formation of a gummy orange precipitate. The mixture was stirred for 1.5 h at 22 °C and then the gummy precipitate was allowed to settle. The clear MTBE solution was sampled (5 mL), concentrated, and the resulting residue (25 mg) analyzed by <sup>1</sup>H NMR to reveal aziridinium mesylate **10a**. The lower gum was sampled and also subjected to <sup>1</sup>H NMR analysis to reveal a mixture of **10a** and triethylammonium mesylate.

A. <sup>1</sup>H NMR Data for **10a**: <sup>1</sup>H NMR (400 MHz, CDCl<sub>3</sub>) δ 7.26 – 7.58 (comp. m, 5H); 4.84 (t, *J* = 7.7 Hz, 1H); 3.91 (m, 1H); 3.81 (m, 1H); 3.74 (m, 1H); 3.63 (m, 1H); 3.07 (m, 1H); 2.77 (s, 3H); 2.69, (m, 1H); 1.98 (m, 2H); 1.64 (m, 2H); 1.40 (m, 2H).

B.  $^1\text{H}$  NMR Spectrum of **10a**:

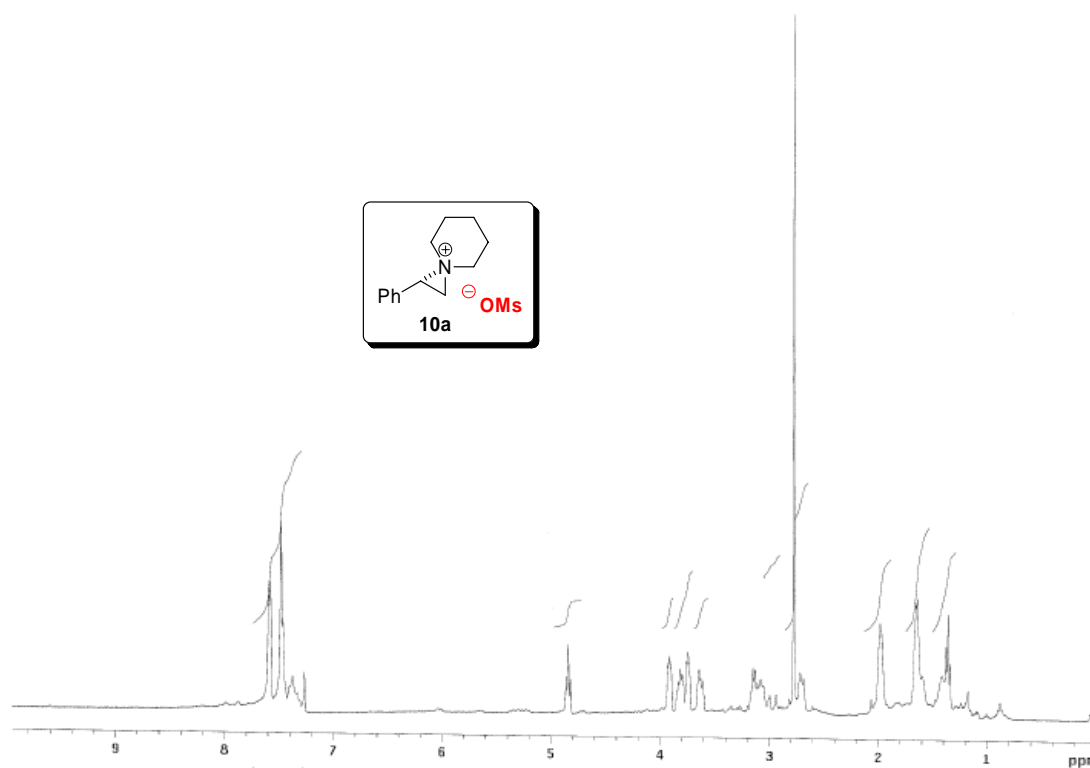

C.  $^1\text{H}$  NMR Spectrum of Precipitate from  $\text{Ms}_2\text{O}$  Reaction:

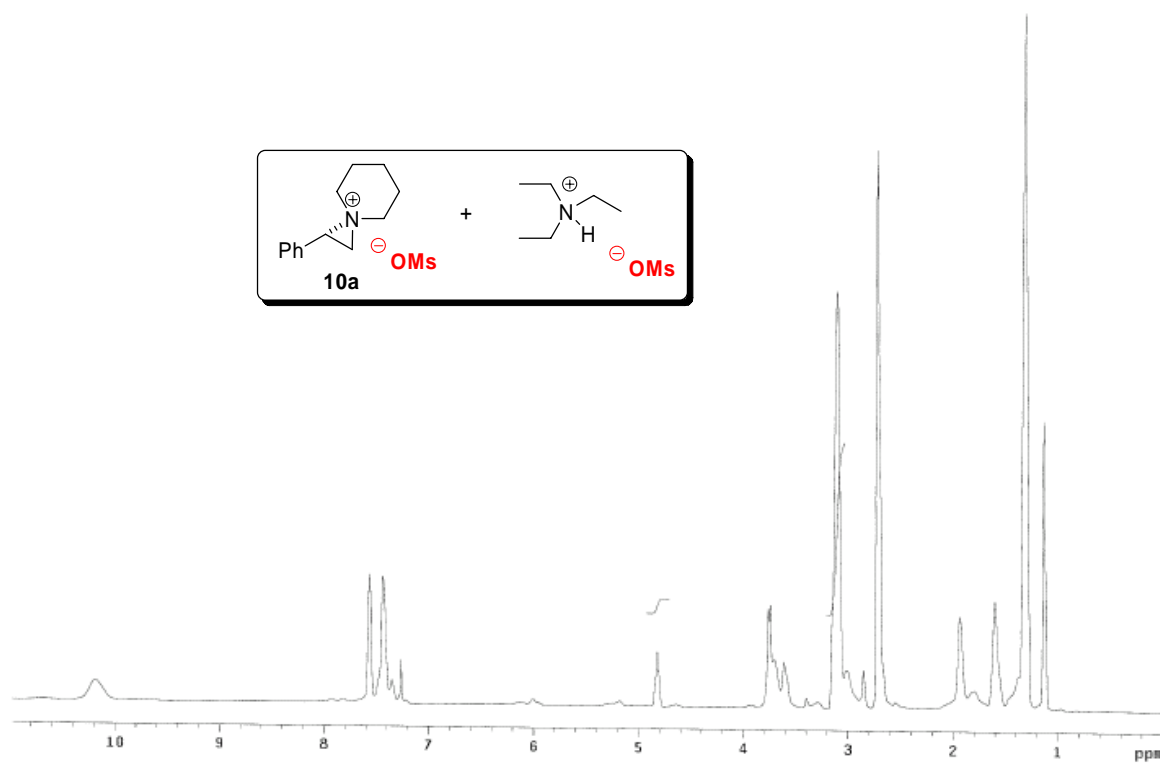

D.  $^1\text{H}$  NMR Spectrum of Triethylammonium Mesylate Reference Standard:

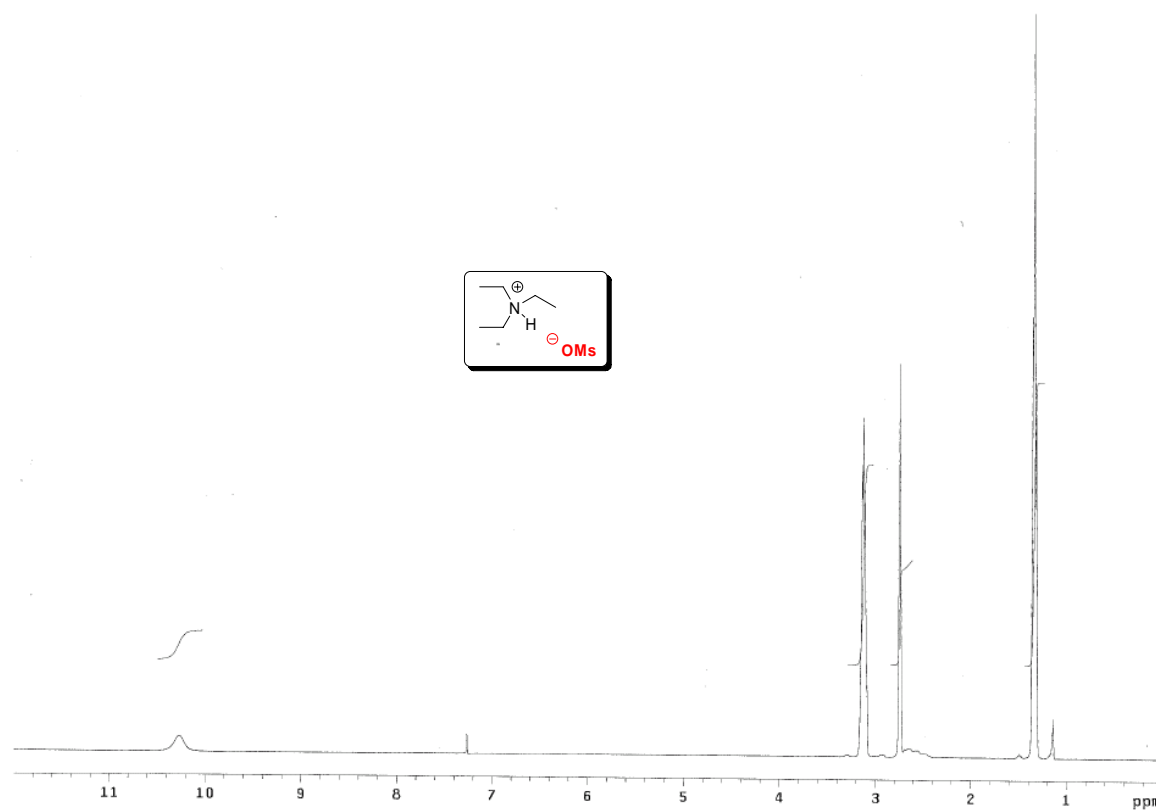

### References:

(1) For  $^1\text{H}$  NMR Spectral data for aminoalcohols (*R*)-**8a** and (*S*)-**8b**, see: de Sousa, S. E.; O'Brien, P.; Poumellec, P. *J. Chem. Soc. Perkin Trans. 1* **1998**, 1483.
